# Supplementary material
Source: PubMed Central journal article supplement (PMC4345450)
Supplement: rspb20142782supp1.pdf [file rspb20142782supp1.pdf]

# Ocean acidification induces biochemical and morphological changes in the calcification process of large benthic foraminifera

Martina Prazeres<sup>1,\*</sup>, Sven Uthicke<sup>2</sup>, John M. Pandolfi<sup>1</sup>

<sup>1</sup>Australian Research Council (ARC) Centre of Excellence for Coral Reef Studies and School of Biological Sciences, The University of Queensland, St. Lucia, Queensland 4072, Australia.

<sup>2</sup>Australian Institute of Marine Science, PMB No 3, Townsville, Queensland 4810, Australia.

\*Author for correspondence (m.prazeres@uq.edu.au)

## Supplementary material

**Figure S1.** The relationship between surface area and buoyant weight of (a) *Amphistegina lessonii* and (b) *Marginopora vertebralis* grown under different pH conditions. Ambient: pH 8.1/ 430  $\mu\text{atm CO}_2$ ; High: pH 7.9/ 855  $\mu\text{atm CO}_2$ ; Intermediate: pH 7.7/ 1000  $\mu\text{atm CO}_2$ ; Low: pH 7.6/ 2000  $\mu\text{atm CO}_2$ .

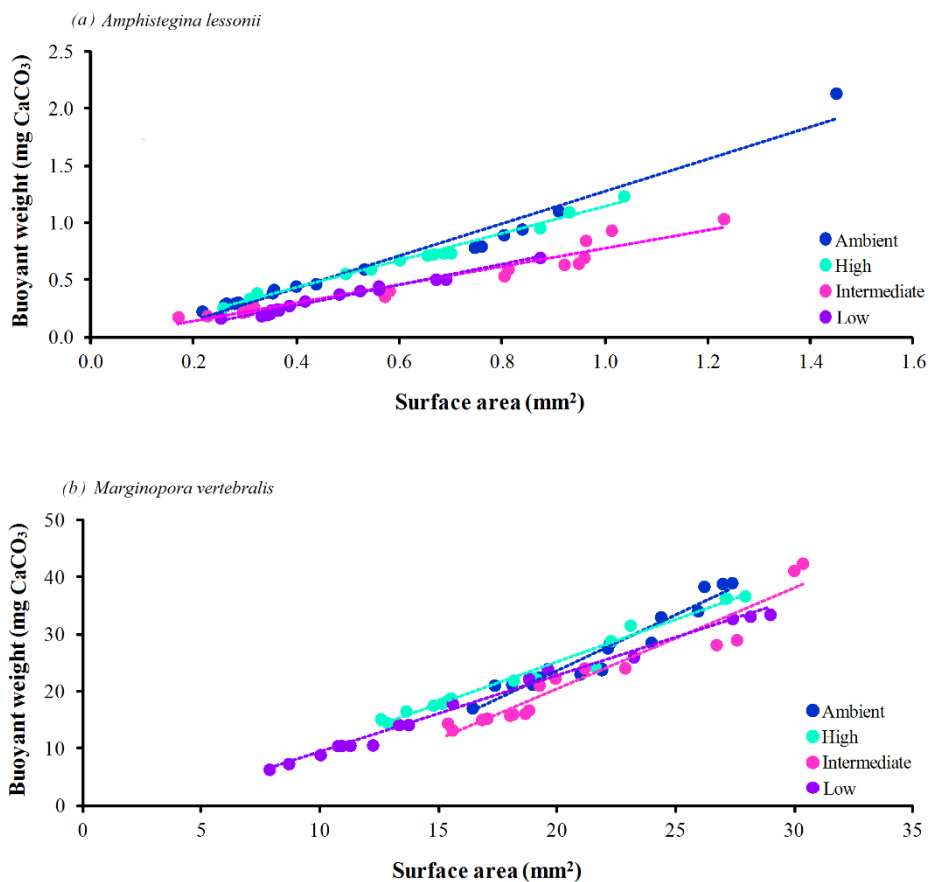

**Table S1. Weekly seawater and carbonate system parameters for the 30-day experiment (mean  $\pm$  SE; N = 4).**

| Week | Measured parameters |                                 |                                        |                   | Calculated parameters*                 |                                    |                                              |                      |
|------|---------------------|---------------------------------|----------------------------------------|-------------------|----------------------------------------|------------------------------------|----------------------------------------------|----------------------|
|      | Treatment           | $A_T$ ( $\mu\text{mol/kg-SW}$ ) | $\text{DIC}$ ( $\mu\text{mol/kg-SW}$ ) | $\text{pH}$ (NBS) | $\text{DIC}$ ( $\mu\text{mol/kg-SW}$ ) | $p\text{CO}_2$ ( $\mu\text{atm}$ ) | $\text{CO}_3^{2-}$ ( $\mu\text{mol/kg-SW}$ ) | $\Omega_{\text{Ca}}$ |
| 1    | pH 8.1              | $2249 \pm 1.51$                 | $1901 \pm 15$                          | $8.25 \pm 0.04$   | $1900 \pm 15$                          | $321 \pm 46$                       | $232 \pm 18$                                 | $5.58 \pm 0.45$      |
|      | pH 7.9              | $2253 \pm 0.31$                 | $1993 \pm 2$                           | $7.92 \pm 0.02$   | $2019 \pm 22$                          | $746 \pm 35$                       | $118 \pm 5$                                  | $2.85 \pm 0.13$      |
|      | pH 7.7              | $2251 \pm 2.15$                 | $2052 \pm 13$                          | $7.74 \pm 0.01$   | $2005 \pm 14$                          | $1180 \pm 25$                      | $78 \pm 2$                                   | $1.88 \pm 0.04$      |
|      | pH 7.6              | $2251 \pm 0.83$                 | $2092 \pm 1$                           | $7.64 \pm 0.006$  | $2006 \pm 7$                           | $1160 \pm 20$                      | $79 \pm 1$                                   | $1.91 \pm 0.02$      |
| 2    | pH 8.1              | $2281 \pm 0.50$                 | $1992 \pm 3$                           | $8.13 \pm 0.01$   | $1991 \pm 3$                           | $447 \pm 5$                        | $185 \pm 1$                                  | $4.45 \pm 0.03$      |
|      | pH 7.9              | $2285 \pm 2.11$                 | $2059 \pm 8$                           | $7.84 \pm 0.01$   | $2083 \pm 8$                           | $939 \pm 31$                       | $103 \pm 3$                                  | $2.48 \pm 0.08$      |
|      | pH 7.7              | $2292 \pm 2.96$                 | $2084 \pm 15$                          | $7.73 \pm 0.03$   | $2117 \pm 6$                           | $1262 \pm 78$                      | $82 \pm 5$                                   | $1.99 \pm 0.12$      |
|      | pH 7.6              | $2300 \pm 2.13$                 | $2115 \pm 1$                           | $7.68 \pm 0.01$   | $2140 \pm 5$                           | $1418 \pm 43$                      | $74 \pm 2$                                   | $1.79 \pm 0.04$      |
| 3    | pH 8.1              | $2279 \pm 1.24$                 | $2032 \pm 2$                           | $8.15 \pm 0.006$  | $2010 \pm 11$                          | $434 \pm 7$                        | $197 \pm 2$                                  | $4.74 \pm 0.05$      |
|      | pH 7.9              | $2291 \pm 2.64$                 | $2088 \pm 6$                           | $7.90 \pm 0.02$   | $2088 \pm 7$                           | $821 \pm 59$                       | $121 \pm 7$                                  | $2.92 \pm 0.17$      |
|      | pH 7.7              | $2288 \pm 2.63$                 | $2126 \pm 4$                           | $7.73 \pm 0.01$   | $2124 \pm 4$                           | $1245 \pm 40$                      | $83 \pm 2$                                   | $2.00 \pm 0.05$      |
|      | pH 7.6              | $2288 \pm 1.86$                 | $2135 \pm 1$                           | $7.59 \pm 0.03$   | $2150 \pm 2$                           | $1754 \pm 139$                     | $62 \pm 5$                                   | $1.50 \pm 0.11$      |
| 4    | pH 8.1              | $2259 \pm 3.29$                 | $1987 \pm 3$                           | $8.07 \pm 0.03$   | $1993 \pm 4$                           | $517 \pm 38$                       | $165 \pm 10$                                 | $3.98 \pm 0.25$      |
|      | pH 7.9              | $2256 \pm 0.71$                 | $2078 \pm 3$                           | $7.85 \pm 0.02$   | $2042 \pm 18$                          | $913 \pm 51$                       | $107 \pm 6$                                  | $2.59 \pm 0.15$      |
|      | pH 7.7              | $2258 \pm 3.60$                 | $2136 \pm 2$                           | $7.83 \pm 0.008$  | $2142 \pm 4$                           | $983 \pm 17$                       | $105 \pm 2$                                  | $2.54 \pm 0.05$      |
|      | pH 7.6              | $2260 \pm 2.69$                 | $2224 \pm 7$                           | $7.51 \pm 0.006$  | $2224 \pm 8$                           | $2245 \pm 32$                      | $51 \pm 1$                                   | $1.22 \pm 0.02$      |

\*Equilibrium constant K1, K2 used according to Mehrbach et al. (1973), modified by Dickson and Millero (1987).

**Table S2. Mixed-model ANOVA results for growth rates (surface area and buoyant weight) of *Amphistegina lessonii* and *Marginopora vertebralis*.**

| Species               | Response variable | Source               | dF | MS     | F     | <i>P</i>        |
|-----------------------|-------------------|----------------------|----|--------|-------|-----------------|
| <i>A. lessonii</i>    | Surface area      | Treatment            | 3  | 0.0043 | 3.06  | 0.07            |
|                       |                   | Aquarium (Treatment) | 12 | 0.0014 | 8.55  | <b>&lt;0.01</b> |
|                       |                   | Residual             | 16 | 0.0002 |       |                 |
|                       | Buoyant weight    | Treatment            | 3  | 0.0247 | 15.66 | <b>&lt;0.01</b> |
|                       |                   | Aquarium (Treatment) | 12 | 0.0016 | 4.97  | <b>&lt;0.01</b> |
|                       |                   | Residual             | 16 | 0.0003 |       |                 |
| <i>M. vertebralis</i> | Surface area      | Treatment            | 3  | 0.0113 | 3.10  | 0.07            |
|                       |                   | Aquarium (Treatment) | 12 | 0.0036 | 2.10  | 0.08            |
|                       |                   | Residual             | 16 | 0.0017 |       |                 |
|                       | Buoyant weight    | Treatment            | 3  | 0.0034 | 2.62  | 0.09            |
|                       |                   | Aquarium (Treatment) | 12 | 0.0013 | 9.47  | <b>&lt;0.01</b> |
|                       |                   | Residual             | 16 | 0.0001 |       |                 |

**Table S3. Tukey's HSD test results for differences in growth rates (surface area and buoyant weight) in *Amphistegina lessonii*.**

| Response variable | Comparison groups | Mean*         | Lower 95% C.I. | Mean difference | Upper 95% C.I. | P-value         |
|-------------------|-------------------|---------------|----------------|-----------------|----------------|-----------------|
| Surface area      | <b>pH 8.1</b>     | <b>0.4226</b> |                |                 |                |                 |
|                   | -pH 7.9           | 0.4775        | -0.1107        | -0.0549         | 0.0008         | 0.05            |
|                   | -pH 7.7           | 0.4611        | -0.0943        | -0.0385         | 0.0172         | 0.22            |
|                   | -pH 7.6           | 0.4482        | -0.0814        | -0.0256         | 0.0301         | 0.54            |
|                   | <b>pH 7.9</b>     | <b>0.4775</b> |                |                 |                |                 |
|                   | -pH 7.7           | 0.4611        | -0.0393        | 0.0164          | 0.0721         | 0.81            |
|                   | -pH 7.6           | 0.4482        | -0.0264        | 0.0293          | 0.0850         | 0.43            |
|                   | <b>pH 7.7</b>     | <b>0.4611</b> |                |                 |                |                 |
|                   | -pH 7.6           | 0.4482        | -0.0428        | 0.0128          | 0.0686         | 0.89            |
|                   | Buoyant weight    | <b>pH 8.1</b> | <b>0.4477</b>  |                 |                |                 |
| -pH 7.9           |                   | 0.4729        | -0.0843        | -0.0252         | 0.0338         | 0.60            |
| -pH 7.7           |                   | 0.4122        | -0.0236        | 0.0354          | 0.0945         | 0.32            |
| -pH 7.6           |                   | 0.3448        | 0.0437         | 0.1028          | 0.1619         | <b>&lt;0.01</b> |
| <b>pH 7.9</b>     |                   | <b>0.4729</b> |                |                 |                |                 |
| -pH 7.7           |                   | 0.4122        | 0.0015         | 0.0606          | 0.1197         | <b>0.04</b>     |
| -pH 7.6           |                   | 0.3448        | 0.0689         | 0.1280          | 0.1871         | <b>&lt;0.01</b> |
| <b>pH 7.7</b>     |                   | <b>0.4122</b> |                |                 |                |                 |
| -pH 7.6           |                   | 0.3448        | 0.0083         | 0.0674          | 0.1264         | <b>0.02</b>     |

\*Data were arc sine-square root transformed, and values of sample mean refer to transformed values.

**Table S4. Tukey's HSD test results for differences in growth rates (surface area and buoyant weight) in *Marginopora vertebralis*.**

| Response variable | Comparison groups | Mean*         | Lower 95% C.I. | Mean difference | Upper 95% C.I. | P-value |
|-------------------|-------------------|---------------|----------------|-----------------|----------------|---------|
| Surface area      | <b>pH 8.1</b>     | <b>0.1249</b> |                |                 |                |         |
|                   | -pH 7.9           | 0.1234        | -0.0192        | 0.0014          | 0.0220         | 0.08    |
|                   | -pH 7.7           | 0.1485        | -0.0443        | -0.0236         | -0.0030        | 0.15    |
|                   | -pH 7.6           | 0.1455        | -0.0413        | -0.0206         | -1.37E-05      | 0.82    |
|                   | <b>pH 7.9</b>     | <b>0.1234</b> |                |                 |                |         |
|                   | -pH 7.7           | 0.1485        | -0.0457        | -0.0250         | -0.0044        | 0.97    |
|                   | -pH 7.6           | 0.1455        | -0.0427        | -0.0221         | -0.0014        | 0.31    |
|                   | <b>pH 7.7</b>     | <b>0.1485</b> |                |                 |                |         |
|                   | -pH 7.6           | 0.1455        | -0.0176        | 0.0029          | 0.0236         | 0.51    |
|                   | Buoyant weight    | <b>pH 8.1</b> | <b>0.1698</b>  |                 |                |         |
| -pH 7.9           |                   | 0.2099        | -0.0935        | -0.0401         | 0.0131         | 0.16    |
| -pH 7.7           |                   | 0.2096        | -0.0932        | -0.0399         | 0.0134         | 0.17    |
| -pH 7.6           |                   | 0.1803        | -0.0638        | -0.0105         | 0.0428         | 0.93    |
| <b>pH 7.9</b>     |                   | <b>0.2099</b> |                |                 |                |         |
| -pH 7.7           |                   | 0.2096        | -0.0530        | 0.0003          | 0.0536         | 1.00    |
| -pH 7.6           |                   | 0.1803        | -0.0237        | 0.0296          | 0.0829         | 0.39    |
| <b>pH 7.7</b>     |                   | <b>0.2096</b> |                |                 |                |         |
| -pH 7.6           |                   | 0.1803        | -0.0240        | 0.0293          | 0.0826         | 0.40    |

\*Data were arc sine-square root transformed, and values of sample mean refer to transformed values.

**Table S5. Comparison between slopes among pH treatments for *Amphistegina lessonii* and *Marginopora vertebralis*.** SDD stands for the standard error of the difference between slopes of the linearised function defining the relationship between BW and surface area.

| Comparison between slopes | <i>A. lessonii</i> |        |                 | <i>M. vertebralis</i> |        |                 |
|---------------------------|--------------------|--------|-----------------|-----------------------|--------|-----------------|
|                           | SSD                | t-test | <i>P</i>        | SDD                   | t-test | <i>P</i>        |
| pH 8.1 (Ambient) x pH 7.9 | 0.04               | 0.62   | 0.53            | 0.12                  | 2.95   | <b>&lt;0.01</b> |
| pH 8.1 (Ambient) x pH 7.7 | 0.06               | 2.51   | <b>0.02</b>     | 0.13                  | -1.17  | <b>&lt;0.01</b> |
| pH 8.1 (Ambient) x pH 7.6 | 0.07               | -2.26  | <b>0.03</b>     | 0.08                  | 1.66   | 0.10            |
| pH 7.9 x pH 7.7           | 0.06               | 2.17   | <b>0.04</b>     | 0.06                  | 6.13   | <b>&lt;0.01</b> |
| pH 7.9 x pH 7.6           | 0.07               | -2.72  | <b>0.01</b>     | 0.04                  | 7.32   | <b>&lt;0.01</b> |
| pH 7.7 x pH 7.6           | 0.08               | -3.84  | <b>&lt;0.01</b> | 0.06                  | -1.27  | 0.21            |

**Table S6. One-way ANOVA results for shell density of *Amphistegina lessonii* and *Marginopora vertebralis*.**

| Species               | Source    | dF | MS   | F     | <i>P</i>         |
|-----------------------|-----------|----|------|-------|------------------|
| <i>A. lessonii</i>    | Treatment | 3  | 0.03 | 10.32 | <b>&lt;0.001</b> |
|                       | Residual  | 19 | 0.00 |       |                  |
| <i>M. vertebralis</i> | Treatment | 3  | 0.00 | 2.25  | 0.12             |
|                       | Residual  | 19 | 0.00 |       |                  |

**Table S7. Tukey's HSD test results for density of *Amphistegina lessonii* and *Marginopora vertebralis*.**

| Species            | Comparison groups     | Mean          | Lower 95% C.I. | Mean difference | Upper 95% C.I. | P-value         |
|--------------------|-----------------------|---------------|----------------|-----------------|----------------|-----------------|
| <i>A. lessonii</i> | <b>pH 8.1</b>         | <b>1.542</b>  |                |                 |                |                 |
|                    | -pH 7.9               | 1.474         | -0.0380        | 0.068           | 0.1740         | 0.295           |
|                    | -pH 7.7               | 1.504         | -0.0680        | 0.038           | 0.1440         | 0.739           |
|                    | -pH 7.6               | 1.348         | 0.0879         | 0.194           | 0.3000         | <b>&lt;0.01</b> |
|                    | <b>pH 7.9</b>         | <b>1.474</b>  |                |                 |                |                 |
|                    | -pH 7.7               | 1.504         | -0.1360        | -0.03           | 0.0760         | 0.085           |
|                    | -pH 7.6               | 1.348         | 0.0199         | 0.126           | 0.2320         | 0.017           |
|                    | <b>pH 7.7</b>         | <b>1.504</b>  |                |                 |                |                 |
|                    | -pH 7.6               | 1.348         | 0.0499         | 0.156           | 0.2620         | 0.017           |
|                    | <i>M. vertebralis</i> | <b>pH 8.1</b> | <b>2.104</b>   |                 |                |                 |
| -pH 7.9            |                       | 2.116         | -0.0928        | -0.012          | 0.0689         | 0.973           |
| -pH 7.7            |                       | 2.056         | -0.0328        | 0.048           | 0.1288         | 0.357           |
| -pH 7.6            |                       | 2.062         | -0.0388        | 0.042           | 0.1228         | 0.469           |
| <b>pH 7.9</b>      |                       | <b>2.116</b>  |                |                 |                |                 |
| -pH 7.7            |                       | 2.056         | -0.0208        | 0.06            | 0.1408         | 0.189           |
| -pH 7.6            |                       | 2.062         | -0.0268        | 0.054           | 0.1348         | 0.263           |
| <b>pH 7.7</b>      |                       | <b>2.056</b>  |                |                 |                |                 |
| -pH 7.6            |                       | 2.062         | -0.0868        | -0.006          | 0.0748         | 0.996           |



**Table S8. Two-way ANOVA results for Ca-ATPase and Mg-ATPase enzymatic activity of *Amphistegina lessonii* and *Marginopora vertebralis*.**

| Species               | Response variable | Source         | dF | MS      | F      | P     |
|-----------------------|-------------------|----------------|----|---------|--------|-------|
| <i>A. lessonii</i>    | Ca-ATPase         | Treatment      | 3  | 0.6000  | 37.58  | <0.01 |
|                       |                   | Time           | 2  | 9.6143  | 708.6  | <0.01 |
|                       |                   | Treatment*Time | 6  | 0.2733  | 20.15  | <0.01 |
|                       |                   | Residual       | 84 | 0.0136  |        |       |
|                       | Mg-ATPase         | Treatment      | 3  | 0.3529  | 24.60  | <0.01 |
|                       |                   | Time           | 2  | 4.2036  | 293.11 | <0.01 |
|                       |                   | Treatment*Time | 6  | 0.3015  | 21.02  | <0.01 |
|                       |                   | Residual       | 84 | 0.0143  |        |       |
| <i>M. vertebralis</i> | Ca-ATPase         | Treatment      | 3  | 0.0895  | 7.78   | <0.01 |
|                       |                   | Time           | 2  | 0.2347  | 20.41  | <0.01 |
|                       |                   | Treatment*Time | 6  | 0.02400 | 2.08   | 0.064 |
|                       |                   | Residual       | 84 | 0.0115  |        |       |
|                       | Mg-ATPase         | Treatment      | 3  | 0.1659  | 11.56  | <0.01 |
|                       |                   | Time           | 2  | 0.3979  | 27.72  | <0.01 |
|                       |                   | Treatment*Time | 6  | 0.2815  | 14.50  | <0.01 |
|                       |                   | Residual       | 84 | 0.0143  |        |       |

**Table S9. Tukey's HSD test results for Ca-ATPase and Mg-ATPase in *Amphistegina lessonii*.**

| Response variable | Comparison groups | Mean*         | Lower 95% C.I. | Mean difference | Upper 95% C.I. | P-value         |
|-------------------|-------------------|---------------|----------------|-----------------|----------------|-----------------|
| Ca-ATPase         | <b>pH 8.1</b>     | <b>0.694</b>  |                |                 |                |                 |
|                   | -pH 7.9           | 0.963         | -0.3579        | -0.2695         | -0.1813        | <b>&lt;0.01</b> |
|                   | -pH 7.7           | 0.940         | -0.3349        | -0.2466         | -0.1584        | <b>&lt;0.01</b> |
|                   | -pH 7.6           | 1.025         | -0.4197        | -0.3314         | -0.2432        | <b>&lt;0.01</b> |
|                   | <b>pH 7.9</b>     | <b>0.963</b>  |                |                 |                |                 |
|                   | -pH 7.7           | 0.940         | -0.0654        | 0.0229          | 0.1112         | 0.90            |
|                   | -pH 7.6           | 1.025         | -0.1502        | -0.0618         | 0.0264         | 0.26            |
|                   | <b>pH 7.7</b>     | <b>0.940</b>  |                |                 |                |                 |
|                   | -pH 7.6           | 1.025         | -0.1731        | -0.0847         | 0.0035         | 0.06            |
|                   | Mg-ATPase         | <b>pH 8.1</b> | <b>0.821</b>   |                 |                |                 |
| -pH 7.9           |                   | 1.017         | -0.2862        | -0.1954         | -0.1046        | <b>&lt;0.01</b> |
| -pH 7.7           |                   | 1.111         | -0.3807        | -0.2899         | -0.1991        | <b>&lt;0.01</b> |
| -pH 7.6           |                   | 0.961         | -0.2304        | -0.1396         | -0.0488        | <b>&lt;0.01</b> |
| <b>pH 7.9</b>     |                   | <b>1.017</b>  |                |                 |                |                 |
| -pH 7.7           |                   | 1.111         | -0.1853        | -0.0945         | -0.0037        | <b>0.04</b>     |
| -pH 7.6           |                   | 0.961         | -0.0349        | 0.0557          | 0.1465         | 0.38            |
| <b>pH 7.7</b>     |                   | <b>1.111</b>  |                |                 |                |                 |
| -pH 7.6           |                   | 0.961         | 0.0595         | 0.1503          | 0.2411         | <b>&lt;0.01</b> |

\*Data were log transformed, and values of sample mean refer to transformed values.

**Table S10. Tukey's HSD test results for Ca-ATPase and Mg-ATPase in *Marginopora vertebralis*.**

| Response variable | Comparison groups | Mean          | Lower 95% C.I. | Mean difference | Upper 95% C.I. | P-value         |
|-------------------|-------------------|---------------|----------------|-----------------|----------------|-----------------|
| Ca-ATPase         | <b>pH 8.1</b>     | <b>0.6290</b> |                |                 |                |                 |
|                   | -pH 7.9           | 0.5498        | -0.0019        | 0.0793          | 0.1606         | 0.05            |
|                   | -pH 7.7           | 0.5938        | -0.0460        | 0.0352          | 0.1165         | 0.67            |
|                   | -pH 7.6           | 0.6943        | -0.1465        | -0.0652         | 0.0160         | 0.16            |
|                   | <b>pH 7.9</b>     | <b>0.5498</b> |                |                 |                |                 |
|                   | -pH 7.7           | 0.5938        | -0.1253        | -0.0440         | 0.0372         | 0.49            |
|                   | -pH 7.6           | 0.6943        | -0.2258        | -0.1445         | -0.0633        | <b>&lt;0.01</b> |
|                   | <b>pH 7.7</b>     | <b>0.5938</b> |                |                 |                |                 |
|                   | -pH 7.6           | 0.6943        | -0.1818        | -0.1005         | -0.0192        | <b>&lt;0.01</b> |
|                   | Mg-ATPase         | <b>pH 8.1</b> | <b>1.111</b>   |                 |                |                 |
| -pH 7.9           |                   | 0.9393        | 0.0808         | 0.1717          | 0.2625         | <b>&lt;0.01</b> |
| -pH 7.7           |                   | 0.9477        | 0.0725         | 0.1633          | 0.2541         | <b>&lt;0.01</b> |
| -pH 7.6           |                   | 1.0510        | -0.0308        | 0.0600          | 0.1508         | 0.31            |
| <b>pH 7.9</b>     |                   | <b>0.9393</b> |                |                 |                |                 |
| -pH 7.7           |                   | 0.9477        | -0.0991        | -0.0084         | 0.0824         | 0.99            |
| -pH 7.6           |                   | 1.0510        | -0.2025        | -0.1117         | -0.0208        | <b>&lt;0.01</b> |
| <b>pH 7.7</b>     |                   | <b>0.9477</b> |                |                 |                |                 |
| -pH 7.6           |                   | 1.0510        | -0.1941        | -0.1033         | -0.0124        | 0.02            |

**Table S11. Shapiro-Wilk's normality and Levene's homogeneity of variance tests results of all variables tested for *Amphistegina lessonii*.**

| Species            | Response variable | Test      | Test value | Probability |
|--------------------|-------------------|-----------|------------|-------------|
| <i>A. lessonii</i> | Surface area      | Normality | 0.99       | 0.99        |
|                    |                   | Variance  | 0.70       | 0.55        |
|                    | Buoyant weight    | Normality | 0.95       | 0.15        |
|                    |                   | Variance  | 1.04       | 0.38        |
|                    | Density           | Normality | 0.96       | 0.56        |
|                    |                   | Variance  | 0.26       | 0.84        |
|                    | Ca-ATPase*        | Normality | 0.97       | 0.06        |
|                    |                   | Variance  | 1.66       | 0.17        |
|                    | Mg-ATPase*        | Normality | 0.96       | 0.06        |
|                    |                   | Variance  | 2.19       | 0.09        |

\*Data were log transformed.

**Table S12.** Results summary of variables analysed of *Amphistegina lessonii* and *Marginopora vertebralis*.

| Species               | Treatment | Response variable         |                             |                      |                        |                        |
|-----------------------|-----------|---------------------------|-----------------------------|----------------------|------------------------|------------------------|
|                       |           | Surface area <sup>a</sup> | Buoyant weight <sup>a</sup> | Density <sup>b</sup> | Ca-ATPase <sup>c</sup> | Mg-ATPase <sup>c</sup> |
| <i>A. lessonii</i>    | pH 8.1    | 0.42 ± 0.01               | 0.48 ± 0.02                 | 1.54 ± 0.03          | 1.03 ± 0.06            | 0.91 ± 0.05            |
|                       | pH 7.9    | 0.43 ± 0.01               | 0.46 ± 0.01                 | 1.47 ± 0.01          | 1.64 ± 0.03            | 1.47 ± 0.03            |
|                       | pH 7.7    | 0.36 ± 0.01               | 0.37 ± 0.00                 | 1.50 ± 0.02          | 1.58 ± 0.03            | 1.71 ± 0.03            |
|                       | pH 7.6    | 0.33 ± 0.01               | 0.31 ± 0.01                 | 1.34 ± 0.02          | 1.86 ± 0.03            | 1.42 ± 0.05            |
| <i>M. vertebralis</i> | pH 8.1    | 0.12 ± 0.00               | 0.16 ± 0.00                 | 2.10 ± 0.01          | 0.62 ± 0.04            | 1.24 ± 0.06            |
|                       | pH 7.9    | 0.16 ± 0.01               | 0.22 ± 0.01                 | 2.12 ± 0.01          | 0.45 ± 0.02            | 0.67 ± 0.02            |
|                       | pH 7.7    | 0.14 ± 0.01               | 0.23 ± 0.02                 | 2.06 ± 0.02          | 0.49 ± 0.03            | 0.72 ± 0.04            |
|                       | pH 7.6    | 0.14 ± 0.00               | 0.17 ± 0.01                 | 2.06 ± 0.02          | 0.57 ± 0.03            | 0.89 ± 0.02            |

<sup>a</sup>Growth rates expressed as % increase day<sup>-1</sup> (mean ±SE; N = 8)

<sup>b</sup>Density after 30 days expressed as mean g CaCO<sub>3</sub> cm<sup>-3</sup> (mean ±SE; N = 5)

<sup>c</sup>Ca-ATPase and Mg-ATPase activities after 30 days expressed as mean μmol P<sub>i</sub> mg protein<sup>-1</sup> h<sup>-1</sup> (mean ± SE; N = 8)

**Table S13. Shapiro-Wilk's normality and Levene's homogeneity of variance tests results of all variables tested for *Marginopora vertebralis*.**

| Species               | Response variable | Test      | Test value | Probability |
|-----------------------|-------------------|-----------|------------|-------------|
| <i>M. vertebralis</i> | Surface area*     | Normality | 0.96       | 0.41        |
|                       |                   | Variance  | 1.80       | 0.16        |
|                       | Buoyant weight    | Normality | 0.95       | 0.15        |
|                       |                   | Variance  | 1.11       | 0.36        |
|                       | Density           | Normality | 0.94       | 0.25        |
|                       |                   | Variance  | 0.56       | 0.64        |
|                       | Ca-ATPase         | Normality | 0.99       | 0.39        |
|                       |                   | Variance  | 1.77       | 0.16        |
|                       | Mg-ATPase         | Normality | 0.98       | 0.62        |
|                       |                   | Variance  | 0.60       | 0.61        |

\*Data were log transformed.
